# Supplementary material
Source: PubMed Central journal article supplement (PMC2952249)
Supplement: supp_M110.141028_jbc.M110.141028-1.pdf [file supp_M110.141028_jbc.M110.141028-1.pdf]

## Supplemental data

Table 1.

| <i>Step</i>              | <i>Volume of fraction (ml)</i> | <i>Concentration (mg/ml)</i> | <i>Total amount (mg)</i> | <i>Activity (units)</i> | <i>Specific activity (units/mg protein)</i> | <i>Yield (%)</i> | <i>Purification factor fold</i> |
|--------------------------|--------------------------------|------------------------------|--------------------------|-------------------------|---------------------------------------------|------------------|---------------------------------|
| <i>Cell lysate</i>       | <i>100</i>                     | <i>13.5</i>                  | <i>1350</i>              | <i>22.3</i>             | <i>0.0165</i>                               | <i>100</i>       | <i>1.0</i>                      |
| <i>Protamine sulfate</i> | <i>100</i>                     | <i>5.63</i>                  | <i>563</i>               | <i>11.3</i>             | <i>0.020</i>                                | <i>50.6</i>      | <i>1.21</i>                     |
| <i>Ni-column</i>         | <i>17.43</i>                   | <i>0.15</i>                  | <i>2.7</i>               | <i>7.2</i>              | <i>2.66</i>                                 | <i>32.28</i>     | <i>161.21</i>                   |
| <i>Phenyl sepharose</i>  | <i>8.5</i>                     | <i>0.21</i>                  | <i>1.8</i>               | <i>6.1</i>              | <i>3.38</i>                                 | <i>27.35</i>     | <i>204.84</i>                   |
| <i>Q-Sepharose</i>       | <i>2.3</i>                     | <i>0.69</i>                  | <i>1.6</i>               | <i>5.8</i>              | <i>3.625</i>                                | <i>26.00</i>     | <i>219.69</i>                   |

**Table 1. Bacterial ceramidase was purified from two liters of culture as described in experimental procedures.** One enzyme unit was defined as the amount capable of hydrolyzing 1  $\mu$ mol ceramide/ min at 37°C using D-erythro-C16 ceramide as a substrate at a concentration of 50  $\mu$ M in a 50 mM (pH 7.1) Tris- HCl buffer containing 1 mM CaCl<sub>2</sub>, 0.1% (w/v) Triton X-100 final concentration, with a total volume of 100  $\mu$ l.

**Table 2.**

| <i>Step</i>              | <i>Volume of fraction (ml)</i> | <i>Concentration (mg/ml)</i> | <i>Total amount (mg)</i> | <i>Activity (units)</i> | <i>Specific activity (units/mg protein)</i> | <i>Yield (%)</i> | <i>Purification factor fold</i> |
|--------------------------|--------------------------------|------------------------------|--------------------------|-------------------------|---------------------------------------------|------------------|---------------------------------|
| <i>Cell lysate</i>       | <i>100</i>                     | <i>7.56</i>                  | <i>756</i>               | <i>17.32</i>            | <i>0.0229</i>                               | <i>100</i>       | <i>1.0</i>                      |
| <i>Protamine sulfate</i> | <i>95</i>                      | <i>3.7</i>                   | <i>352</i>               | <i>9.43</i>             | <i>0.026</i>                                | <i>54.44</i>     | <i>1.135</i>                    |
| <i>Ni-column</i>         | <i>25</i>                      | <i>0.048</i>                 | <i>1.2</i>               | <i>6.23</i>             | <i>5.19</i>                                 | <i>35.96</i>     | <i>226.6</i>                    |
| <i>Phenyl sepharose</i>  | <i>2</i>                       | <i>0.35</i>                  | <i>0.7</i>               | <i>2.4</i>              | <i>3.42</i>                                 | <i>13.8</i>      | <i>149.34</i>                   |

**Table 2. Sphingomyelinase D was purified from four liters of culture as described in experimental procedures.** One enzyme unit was defined as the amount capable of hydrolyzing 1  $\mu$ mol sphingomyelin/ min at 37°C using D-erythro-C16-sphingomyelin as a substrate at a concentration of 50  $\mu$ M in a 10 mM (pH 7.4) HEPES buffer containing 1 mM CaCl<sub>2</sub>, 5 mM KCl, 1 mM MgCl<sub>2</sub>, with a total volume of 100  $\mu$ l.
